# Supplementary material
Source: PubMed Central journal article supplement (PMC7183432)
Supplement: NIHMS1544789-supplement-1.pdf [file NIHMS1544789-supplement-1.pdf]

Supplement Table 1. BROCA Multi-Gene Panel Used in the Current Study

| Gene  | Function/Pathway                 | Heterozygote Cancer risk*    | Associated syndrome                                                     |
|-------|----------------------------------|------------------------------|-------------------------------------------------------------------------|
| ATM   | Double stranded break repair     | Breast, Pancreatic           | Ataxia telangiectasia (recessive)                                       |
| ATR   | Double stranded break repair     | Oropharyngeal                | Seckel (recessive)                                                      |
| BAP1  | BRCA1-associated protein complex | Uveal Melanoma, Mesothelioma | BAP1-Tumor Predisposition Syndrome                                      |
| BARD1 | BRCA1-associated protein complex | Breast, Ovarian              |                                                                         |
| BRCA1 | BRCA1-associated protein complex | Breast, Ovarian              | Hereditary breast and ovarian cancer                                    |
| BRCA2 | Fanconi/BRCA                     | Breast, Ovarian              | Hereditary breast and ovarian cancer, Fanconi anaemia FA-D1 (recessive) |
| BRIP1 | Fanconi/BRCA                     | Breast, Ovarian              | Fanconi anaemia FA-J (recessive)                                        |
| CDH1  | Cell adhesion                    | Breast, Gastric              | Hereditary diffuse gastric cancer                                       |
| CHEK1 | Double stranded break repair     | Unknown                      |                                                                         |
| CHEK2 | Double stranded break repair     | Breast                       |                                                                         |

|                 |                                  |                             |                                                 |
|-----------------|----------------------------------|-----------------------------|-------------------------------------------------|
| CTNNA1          | Beta-catenin, e-cadherin complex | Gastric                     | Hereditary diffuse gastric cancer               |
| FAM175A/Abraxas | Double stranded break repair     | Breast                      |                                                 |
| FANCM           |                                  | Breast                      | Fanconi anemia (recessive)                      |
| GEN1            | Double stranded break repair     | Breast                      |                                                 |
| MLH1            | Mismatch DNA repair              | Colon, Ovarian, Endometrial | Lynch syndrome                                  |
| MRE11A          | Double stranded break repair     | Breast                      | Ataxia-telangiectasia-like disorder (recessive) |
| MSH2 (+EPCAM)   | Mismatch DNA repair              | Colon, Ovarian, Endometrial | Lynch syndrome                                  |
| MSH6            | Mismatch DNA repair              | Colon, Endometrial          | Lynch syndrome                                  |
| NBN             | Double stranded break repair     | Breast                      | Nijmegen breakage syndrome (recessive)          |
| PALB2           | Fanconi/BRCA                     | Breast, Pancreatic          | Fanconi anaemia FA-N (recessive)                |
| PMS2            | Mismatch DNA repair              | Colon, Endometrial          | Lynch syndrome                                  |
| PTEN            | PI3K/MAPK Signaling              | Breast                      | Cowden syndrome                                 |
| RAD51B (exons   | Double stranded break            | Unknown                     |                                                 |

|        |                              |                 |                                  |
|--------|------------------------------|-----------------|----------------------------------|
| only)  | repair                       |                 |                                  |
| RAD51C | Fanconi/BRCA                 | Ovarian, Breast | Fanconi anaemia FA-O (recessive) |
| RAD51D | Fanconi/BRCA                 | Ovarian, Breast | Fanconi anaemia (recessive)      |
| RECQL  |                              | Breast          |                                  |
| RINT1  |                              | Breast, Colon   |                                  |
| SLX4   | Fanconi/BRCA                 | Unknown         | Fanconi anaemia (recessive)      |
| STK11  |                              |                 |                                  |
| TP53   | Cell growth                  | Breast, Ovarian | Li-Fraumeni syndrome             |
| XRCC2  | Double stranded break repair | Breast          | Fanconi anaemia (recessive)      |
